# Supplementary material
Source: PubMed Central journal article supplement (PMC2409257)
Supplement: pnas_0710357105_4.pdf [file pnas_0710357105_4.pdf]

**Table 1. Purification of HRS**

|                                                                           | Total<br>protein,<br>mg | Total<br>activity,<br>nkat | Specific<br>activity,<br>nkat/mg | Purification,<br>fold | Recovery,<br>% |
|---------------------------------------------------------------------------|-------------------------|----------------------------|----------------------------------|-----------------------|----------------|
| Crude extract                                                             | 2461                    | 55                         | 0.022                            | 1                     | 100            |
| (NH <sub>4</sub> ) <sub>2</sub> SO <sub>4</sub><br>precipitation (50-70%) | 931                     | 106                        | 0.11                             | 5                     | 194            |
| Toyopearl Phenyl<br>650M                                                  | 400                     | 29                         | 0.072                            | 3                     | 53             |
| 1st Cosmogel DEAE                                                         | 95                      | 27                         | 0.29                             | 13                    | 50             |
| 1st HiLoad Superdex<br>200                                                | 28                      | 24                         | 0.85                             | 38                    | 44             |
| 2nd Cosmogel DEAE                                                         | 8.6                     | 13                         | 1.5                              | 69                    | 24             |
| MonoQ                                                                     | 0.72                    | 1.4                        | 2.0                              | 89                    | 2.6            |
| 2nd HiLoad Superdex<br>200                                                | 0.36                    | 0.9                        | 2.5                              | 114                   | 1.7            |
