# Supplementary material
Source: PubMed Central journal article supplement (PMC2409257)
Supplement: pnas_0710357105_5.pdf [file pnas_0710357105_5.pdf]

**Table 2. Sequences of the HRS peptides derived after lysylendopeptidase digestion**

| Peptide                             | Sequence*                                            |
|-------------------------------------|------------------------------------------------------|
| HRS $\alpha$ (a 21-kDa polypeptide) |                                                      |
| 1a                                  | (K) LRVTLPDGSSQTQQVDLCK                              |
| 1b                                  | (K) LRVTLD <sup>D</sup> DGSSQTQQVDLCK                |
| 2a                                  | (K) YQVLYMIMVEDPLEGWENCP                             |
| 2b                                  | (K) YQVLYM <sup>L</sup> MVEDPLEGW <sup>D</sup> NCPLK |
| 3a                                  | (K) GILIIYPRELEVVGDDDDSCW                            |
| 3b                                  | ( <sup>K</sup> ) ELEVVGDDDDSCWL                      |
| 4                                   | (K) HVEVHGR <sup>P</sup> K                           |
| HRS $\beta$ (a 23-kDa polypeptide)  |                                                      |
| 5                                   | (K) TDGNEGWDSCPLNVELNLPDGTTQK                        |
| 6                                   | (K) SWVWHSLVFGSIGRLGMEAPK                            |

\*The amino acid residues different from those deduced from the HRS $\alpha$  ORF are shown in red.
