# Supplementary material
Source: PubMed Central journal article supplement (PMC2409257)

**A**

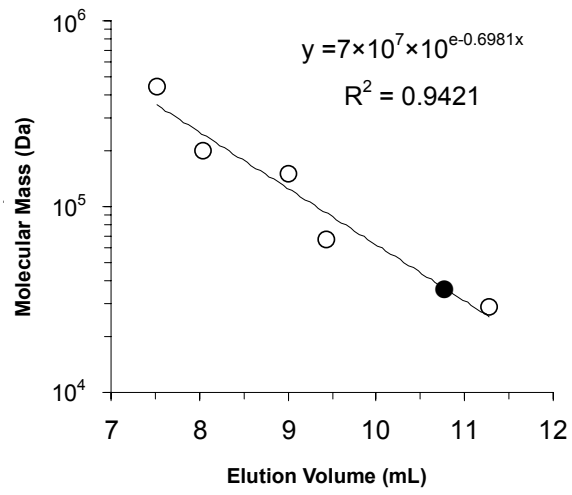

**B**

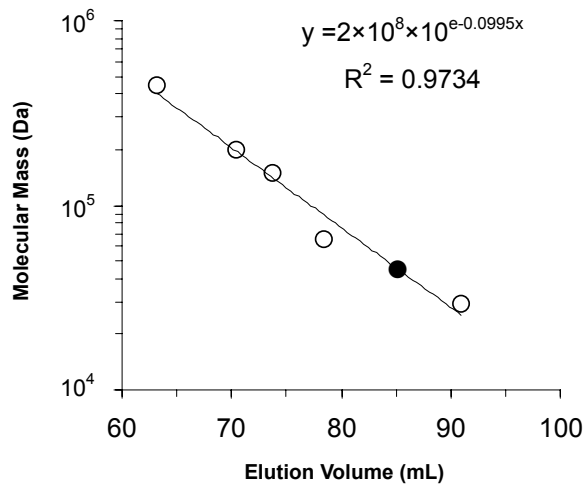

Supplement: pnas_0710357105_1.pdf [file pnas_0710357105_1.pdf]

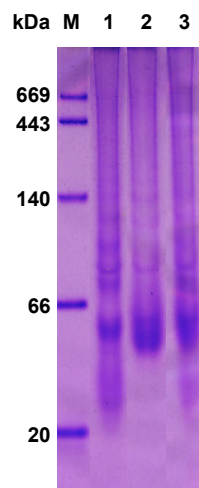

Supplement: pnas_0710357105_2.pdf [file pnas_0710357105_2.pdf]

**A**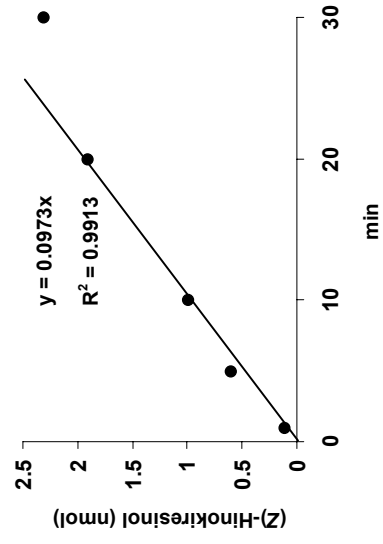**B**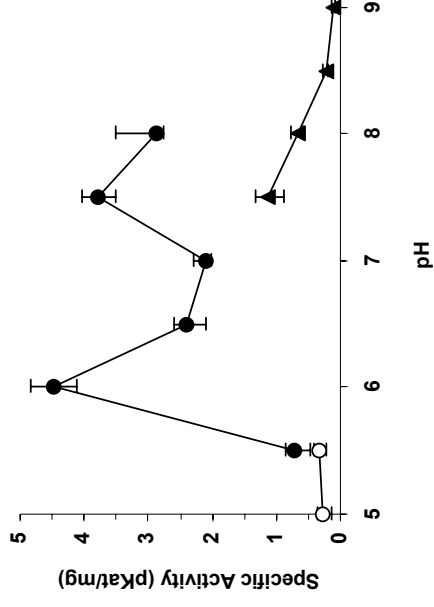**C**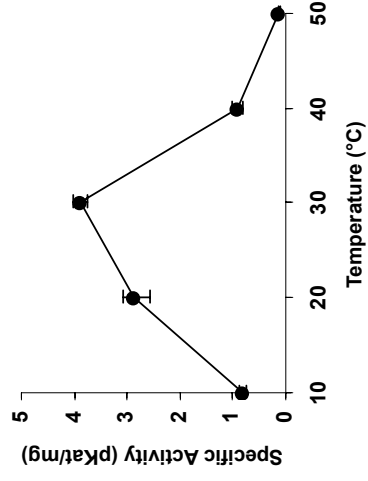**D**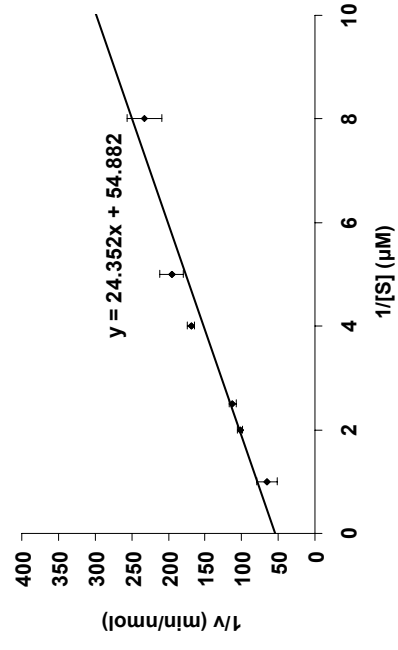

Supplement: pnas_0710357105_3.pdf [file pnas_0710357105_3.pdf]
